# Supplementary material for: Antiproliferative and Tubulin-Destabilising Effects of 3-(Prop-1-en-2-yl)azetidin-2-Ones and Related Compounds in MCF-7 and MDA-MB-231 Breast Cancer Cells
Source: MDPI journal article supplement (doi:10.3390/ph16071000), 2023-07-13
Supplement: s1 [file s1]

# SAMPLE INFORMATION

Sample Name: H in 1mg/ml in MeOH(unfilter) Acquired By: System  
Sample Type: Unknown Sample Set Name: Test\_Xbridgecolumn\_01Jul10  
Vial: 5 Acq. Method Set: Azetidinone\_ACN\_H2O\_MS  
Injection #: 1 Processing Method: Azetidinone\_PM  
Injection Volume: 10.00 ul Channel Name: 2487Channel 1  
Run Time: 20.0 Minutes Proc. Chnl. Descr.: 262nm

Date Acquired: 01/07/2010 09:51:14 IST  
Date Processed: 01/07/2010 11:00:23 IST

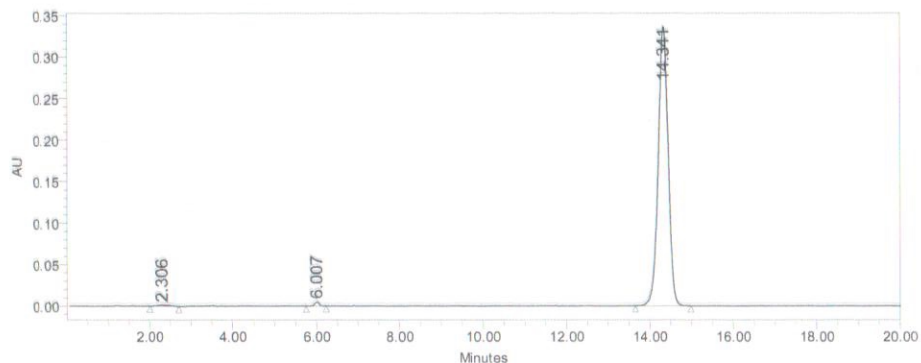

|   | RT     | Area    | % Area | Height |
|---|--------|---------|--------|--------|
| 1 | 2.306  | 22951   | 0.41   | 1124   |
| 2 | 6.007  | 35928   | 0.64   | 4926   |
| 3 | 14.341 | 5531652 | 98.95  | 336943 |

# SAMPLE INFORMATION

Sample Name: Nitro 1mg/ml in ACN Acquired By: System  
Sample Type: Unknown Sample Set Name: Test\_Xbridgecolumn\_01Jul10  
Vial: 42 Acq. Method Set: Azetidinone\_ACN\_H2O\_MS  
Injection #: 1 Processing Method: Azetidinone\_PM  
Injection Volume: 10.00 ul Channel Name: 2487Channel 1  
Run Time: 25.0 Minutes Proc. Chnl. Descr.: 262nm

Date Acquired: 01/07/2010 10:12:22 IST  
Date Processed: 01/07/2010 11:00:23 IST

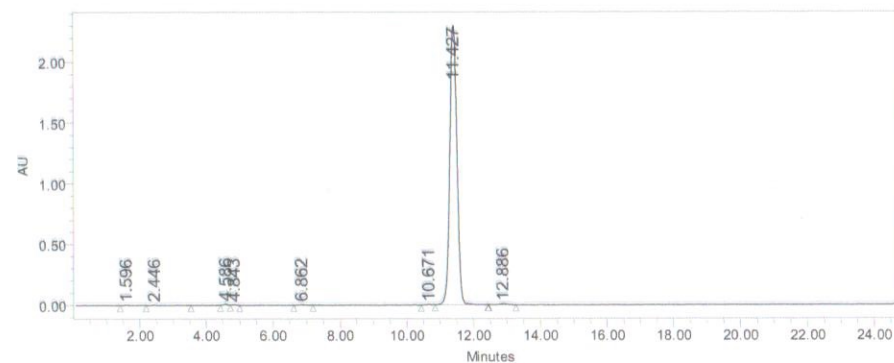

|   | RT     | Area     | % Area | Height  |
|---|--------|----------|--------|---------|
| 1 | 1.596  | 6814     | 0.02   | 1149    |
| 2 | 2.446  | 7823     | 0.02   | 711     |
| 3 | 4.586  | 57818    | 0.17   | 9109    |
| 4 | 4.843  | 25047    | 0.08   | 3921    |
| 5 | 6.862  | 33128    | 0.10   | 3438    |
| 6 | 10.671 | 27080    | 0.08   | 2392    |
| 7 | 11.427 | 32962918 | 99.14  | 2301660 |
| 8 | 12.886 | 127835   | 0.38   | 8135    |
