# Supplementary material for: Antiproliferative and Tubulin-Destabilising Effects of 3-(Prop-1-en-2-yl)azetidin-2-Ones and Related Compounds in MCF-7 and MDA-MB-231 Breast Cancer Cells
Source: MDPI journal article supplement (doi:10.3390/ph16071000), 2023-07-13
Supplement: s1 [file s1]

## Result Set Report

Sample Set Name: Test\_Xbridgecolumn\_01Jul10  
 Sample Set Method: Test\_Xbridgecolumn\_01Jul10  
 System Node: Gx620image  
 System Name: HPLC\_2695\_2487  
 Acquired By: System  
 Sample Set Start Date: 01/07/2010 09:14:02 IST  
 Sample Set Finish Date: 01/07/2010 10:37:34 IST  
 Result Set Date: 01/07/2010 11:00:23 IST

Processed By: System/Administrator  
 Printed By: System  
 Result Set ID: 1401  
 # of Results: 3

**Sample Set Table**

|   | Sample Name                      | Sample Type | Vial | Inj # | Run Time (Minutes) | Injection Volume (ul) | Acquisition Method Set | Sample Weight | Processed Channel Descr. | Dilution |
|---|----------------------------------|-------------|------|-------|--------------------|-----------------------|------------------------|---------------|--------------------------|----------|
| 1 | Hydroxy 1mg/ml in MeOH(unfilter) | Unknown     | 45   | 1     | 20.00              | 10.00                 | Azetidinone_ACN_H2O_MS | 1.00000       | 262nm                    | 1.00000  |
| 2 | H in 1mg/ml in MeOH(unfilter)    | Unknown     | 5    | 1     | 20.00              | 10.00                 | Azetidinone_ACN_H2O_MS | 1.00000       | 262nm                    | 1.00000  |
| 3 | Nitro 1mg/ml in ACN              | Unknown     | 42   | 1     | 25.00              | 10.00                 | Azetidinone_ACN_H2O_MS | 1.00000       | 262nm                    | 1.00000  |

## SAMPLE INFORMATION

Sample Name: Hydroxy 1mg/ml in MeOH(unfilter)  
 Sample Type: Unknown  
 Vial: 45  
 Injection #: 1  
 Injection Volume: 10.00 ul  
 Run Time: 20.0 Minutes

Acquired By: System  
 Sample Set Name: Test\_Xbridgecolumn\_01Jul10  
 Acq. Method Set: Azetidinone\_ACN\_H2O\_MS  
 Processing Method: Azetidinone\_PM  
 Channel Name: 2487Channel 1  
 Proc. Chnl. Descr.: 262nm

Date Acquired: 01/07/2010 09:30:14 IST  
 Date Processed: 01/07/2010 11:00:23 IST

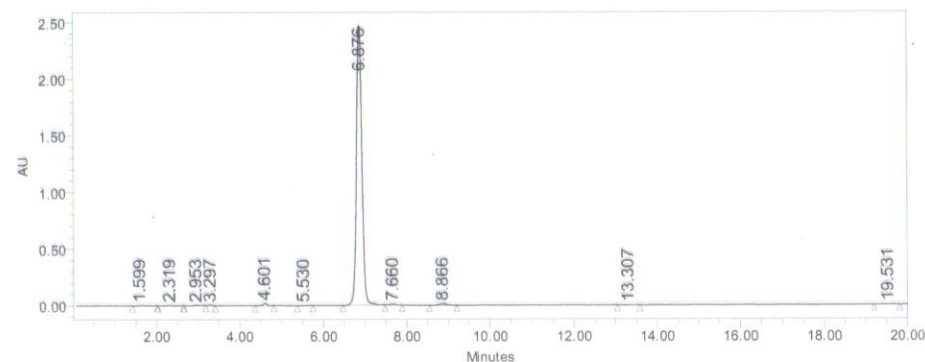

|    | RT     | Area     | % Area | Height  |
|----|--------|----------|--------|---------|
| 1  | 1.599  | 14968    | 0.07   | 2184    |
| 2  | 2.319  | 31538    | 0.14   | 1482    |
| 3  | 2.953  | 11280    | 0.05   | 700     |
| 4  | 3.297  | 13126    | 0.06   | 1964    |
| 5  | 4.601  | 109924   | 0.50   | 18823   |
| 6  | 5.530  | 6256     | 0.03   | 872     |
| 7  | 6.876  | 21679355 | 98.08  | 2478760 |
| 8  | 7.660  | 71103    | 0.32   | 8104    |
| 9  | 8.866  | 135350   | 0.61   | 12621   |
| 10 | 13.307 | 10079    | 0.05   | 699     |
| 11 | 19.531 | 20717    | 0.09   | 1172    |
