# Supplementary material for: Antiproliferative and Tubulin-Destabilising Effects of 3-(Prop-1-en-2-yl)azetidin-2-Ones and Related Compounds in MCF-7 and MDA-MB-231 Breast Cancer Cells
Source: MDPI journal article supplement (doi:10.3390/ph16071000), 2023-07-13
Supplement: s1 [file s1]

Sample Set Name: NH2 test\_22Jul, NH2 test\_A\_22Jul, Processed By: System/Administrator  
Sample Set Method: NH2 test\_22Jul, NH2 test\_A\_22Jul, Printed By: System  
System Node: Gx620image, Result Set ID: 4572, 5171, 5176, 5183, 5186, 5191  
System Name: HPLC\_2695\_2487, # of Results: 23  
Acquired By: System  
Sample Set Start Date: 22/07/2010 09:57:52 IST, 22/07/2010 10:33:37 IST, 22/07/2010 12:01:36 IST, 22/07/2010 13:49:31  
Sample Set Finish Date: 22/07/2010 10:29:05 IST, 22/07/2010 11:35:42 IST, 22/07/2010 13:34:42 IST, 22/07/2010 14:15:34  
Result Set Date: 22/07/2010 10:34:43 IST, 27/07/2010 14:03:40 IST, 27/07/2010 14:03:53 IST, 27/07/2010 14:04:03

Sample Set Table

| Sample Name                    | Sample Type | Vial | Inj # | Run Time (Minutes) | Injection Volume (ul) | Acquisition Method Set | Sample Weight | Processed Channel Descr. | Dilution |
|--------------------------------|-------------|------|-------|--------------------|-----------------------|------------------------|---------------|--------------------------|----------|
| 1 NH2 0.5mg/ml in ACN test     | Unknown     | 25   | 1     | 30.00              | 10.00                 | Azetidinone_MS         | 1.00000       | 262nm                    | 1.00000  |
| 2 NH2 0.5mg/ml in ACN test     | Unknown     | 25   | 1     | 30.00              | 10.00                 | Azetidinone_MS         | 1.00000       | 262nm                    | 1.00000  |
| 3 NH2 0.5mg/ml in ACN test     | Unknown     | 25   | 1     | 30.00              | 10.00                 | Azetidinone_MS         | 1.00000       | 220nm                    | 1.00000  |
| 4 NH2 0.025mg/ml in ACN test   | Unknown     | 26   | 1     | 30.00              | 10.00                 | Azetidinone_MS         | 1.00000       | 262nm                    | 1.00000  |
| 5 NH2 0.025mg/ml in ACN test   | Unknown     | 26   | 1     | 30.00              | 10.00                 | Azetidinone_MS         | 1.00000       | 220nm                    | 1.00000  |
| 6 NH2 0.5mg/ml in ACN test     | Unknown     | 25   | 1     | 25.00              | 10.00                 | Azetidinone_NH2_MS     | 1.00000       | 262nm                    | 1.00000  |
| 7 NH2 0.5mg/ml in ACN test     | Unknown     | 25   | 1     | 25.00              | 10.00                 | Azetidinone_NH2_MS     | 1.00000       | 220                      | 1.00000  |
| 8 NH2 0.025mg/ml in ACN test   | Unknown     | 26   | 1     | 25.00              | 10.00                 | Azetidinone_NH2_MS     | 1.00000       | 262nm                    | 1.00000  |
| 9 NH2 0.025mg/ml in ACN test   | Unknown     | 26   | 1     | 25.00              | 10.00                 | Azetidinone_NH2_MS     | 1.00000       | 220                      | 1.00000  |
| 10 NH2 0.0025mg/ml in ACN test | Unknown     | 27   | 1     | 25.00              | 10.00                 | Azetidinone_NH2_MS     | 1.00000       | 262nm                    | 1.00000  |
| 11 NH2 0.0025mg/ml in ACN test | Unknown     | 27   | 1     | 25.00              | 10.00                 | Azetidinone_NH2_MS     | 1.00000       | 220                      | 1.00000  |
| 12 NH2 0.025mg/ml in ACN test  | Unknown     | 26   | 1     | 25.00              | 10.00                 | Azetidinone_NH2_MS     | 1.00000       | 262nm                    | 1.00000  |
| 13 NH2 0.025mg/ml in ACN test  | Unknown     | 26   | 1     | 25.00              | 10.00                 | Azetidinone_NH2_MS     | 1.00000       | 220                      | 1.00000  |
| 14 NH2 0.5 mg/ml in ACN test   | Unknown     | 25   | 1     | 20.00              | 10.00                 | Azetidinone_NH2_MS     | 1.00000       | 262nm                    | 1.00000  |
| 15 NH2 0.5 mg/ml in ACN test   | Unknown     | 25   | 1     | 20.00              | 10.00                 | Azetidinone_NH2_MS     | 1.00000       | 220                      | 1.00000  |
| 16 NH2 0.025mg/ml in ACN test  | Unknown     | 26   | 1     | 20.00              | 10.00                 | Azetidinone_NH2_MS     | 1.00000       | 262nm                    | 1.00000  |
| 17 NH2 0.025mg/ml in ACN test  | Unknown     | 26   | 1     | 20.00              | 10.00                 | Azetidinone_NH2_MS     | 1.00000       | 220                      | 1.00000  |
| 18 NH2 0.5 mg/ml in ACN test   | Unknown     | 25   | 1     | 20.00              | 10.00                 | Azetidinone_NH2_MS     | 1.00000       | 262nm                    | 1.00000  |
| 19 NH2 0.5 mg/ml in ACN test   | Unknown     | 25   | 1     | 20.00              | 10.00                 | Azetidinone_NH2_MS     | 1.00000       | 220                      | 1.00000  |
| 20 NH2 0.025mg/ml in ACN test  | Unknown     | 26   | 1     | 20.00              | 10.00                 | Azetidinone_NH2_MS     | 1.00000       | 262nm                    | 1.00000  |
| 21 NH2 0.025mg/ml in ACN test  | Unknown     | 26   | 1     | 20.00              | 10.00                 | Azetidinone_NH2_MS     | 1.00000       | 220                      | 1.00000  |
| 22 NH2 0.0025mg/ml in ACN test | Unknown     | 27   | 1     | 20.00              | 10.00                 | Azetidinone_NH2_MS     | 1.00000       | 262nm                    | 1.00000  |
| 23 NH2 0.0025mg/ml in ACN test | Unknown     | 27   | 1     | 20.00              | 10.00                 | Azetidinone_NH2_MS     | 1.00000       | 220                      | 1.00000  |

| SAMPLE INFORMATION |                          |                     |                |
|--------------------|--------------------------|---------------------|----------------|
| Sample Name:       | NH2 0.5mg/ml in ACN test | Acquired By:        | System         |
| Sample Type:       | Unknown n                | Sample Set Name:    | NH2 test_22Jul |
| Vial:              | 25                       | Acq. Method Set:    | Azetidinone_MS |
| Injection #:       | 1                        | Processing Method:  | Azetidinone_PM |
| Injection Volume:  | 10.00 ul                 | Channel Name:       | 2487/Channel 1 |
| Run Time:          | 30.0 Minutes             | Proc. Chnl. Descr.: | 262nm          |
| Date Acquired:     | 22/07/2010 09:58:54 IST  |                     |                |
| Date Processed:    | 22/07/2010 10:34:43 IST  |                     |                |

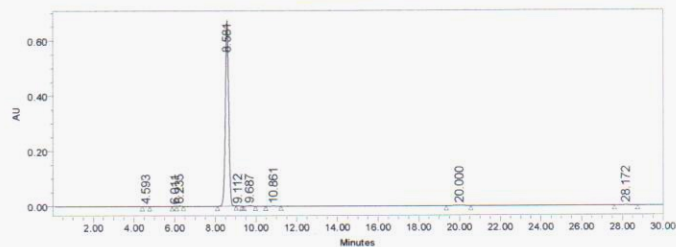

| Peak Name  | RT     | Area    | % Area | Height | Channel Description |
|------------|--------|---------|--------|--------|---------------------|
| 1 Aniline  | 3.200  |         |        |        | 262nm               |
| 2          | 4.593  | 1585    | 0.02   | 234    | 262nm               |
| 3 Aldehyde | 4.900  |         |        |        | 262nm               |
| 4          | 6.011  | 1452    | 0.02   | 226    | 262nm               |
| 5          | 6.235  | 13992   | 0.18   | 1714   | 262nm               |
| 6          | 8.581  | 7722970 | 98.86  | 672714 | 262nm               |
| 7          | 9.112  | 5324    | 0.07   | 588    | 262nm               |
| 8          | 9.687  | 21976   | 0.28   | 1775   | 262nm               |
| 9 Imine    | 10.250 |         |        |        | 262nm               |
| 10         | 10.861 | 4400    | 0.06   | 298    | 262nm               |
| 11         | 20.000 | 32467   | 0.42   | 1342   | 262nm               |
| 12         | 28.172 | 8095    | 0.10   | 260    | 262nm               |

Reported by User: System  
Report Method: Result Set Report

Project Name: generic/Kathy\_Azetidinone  
Date Printed:

Reported by User: System  
Report Method: Result Set Report

Project Name: generic/Kathy\_Azetidinone  
Date Printed:

## SAMPLE INFORMATION

Sample Name: NH2 0.5mg/ml in ACN test, Acquired By: System  
Sample Type: Unknown, Sample Set Name: NH2 test\_A\_22Jul  
Vial: 25, Acq. Method Set: Azetidinone\_MS  
Injection #: 1, Processing Method: Azetidinone\_PM  
Injection Volume: 10.00 ul, Channel Name: 2487/Channel 1, 2487/Channel 2  
Run Time: 30.0 Minutes, Proc. Chnl. Descr.: 220nm, 262nm  
Date Acquired: 22/07/2010 10:34:40 IST  
Date Processed: 27/07/2010 14:03:41 IST

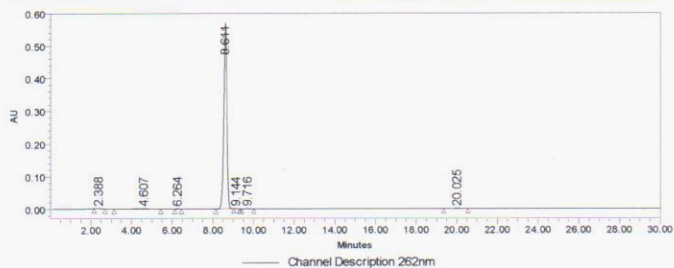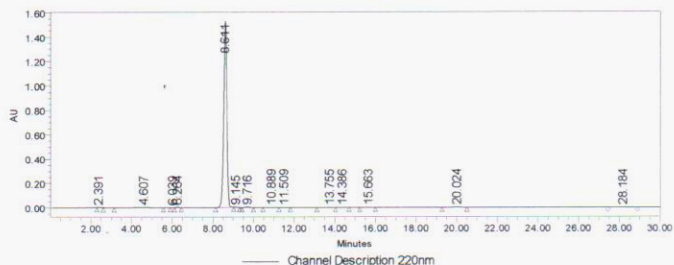

| Peak Name | RT    | Area  | % Area | Height | Channel Description |
|-----------|-------|-------|--------|--------|---------------------|
| 1         | 2.388 | 14391 | 0.22   | 1242   | 262nm               |

Reported by User: System  
Report Method: Result Set Report

Project Name: generic/Kathy\_Azetidinone  
Date Printed:

Reported by User: System  
Report Method: Result Set Report

Project Name: generic/Kathy\_Azetidinone  
Date Printed:

| Peak Name  | RT     | Area     | % Area | Height  | Channel Description |
|------------|--------|----------|--------|---------|---------------------|
| 2          | 2.391  | 14272    | 0.08   | 1758    | 220nm               |
| 3 Aniline  | 3.200  |          |        |         | 262nm               |
| 4 Aniline  | 3.200  |          |        |         | 220nm               |
| 5          | 4.607  | 68055    | 1.06   | 1344    | 262nm               |
| 6          | 4.607  | 122648   | 0.70   | 2339    | 220nm               |
| 7 Aldehyde | 4.900  |          |        |         | 262nm               |
| 8 Aldehyde | 4.900  |          |        |         | 220nm               |
| 9          | 6.039  | 3432     | 0.02   | 539     | 220nm               |
| 10         | 6.264  | 31838    | 0.18   | 4009    | 220nm               |
| 11         | 6.264  | 11487    | 0.18   | 1464    | 262nm               |
| 12         | 8.611  | 6298322  | 97.77  | 572506  | 262nm               |
| 13         | 8.611  | 17094574 | 97.93  | 1528801 | 220nm               |
| 14         | 9.144  | 4959     | 0.08   | 556     | 262nm               |
| 15         | 9.145  | 14909    | 0.09   | 1670    | 220nm               |
| 16         | 9.716  | 17925    | 0.28   | 1494    | 262nm               |
| 17         | 9.716  | 53814    | 0.31   | 4462    | 220nm               |
| 18 Imine   | 10.250 |          |        |         | 262nm               |
| 19 Imine   | 10.250 |          |        |         | 220nm               |
| 20         | 10.889 | 9898     | 0.06   | 683     | 220nm               |
| 21         | 11.509 | 7865     | 0.05   | 562     | 220nm               |
| 22         | 13.755 | 6579     | 0.04   | 322     | 220nm               |
| 23         | 14.386 | 4952     | 0.03   | 305     | 220nm               |
| 24         | 15.663 | 7038     | 0.04   | 385     | 220nm               |
| 25         | 20.024 | 65922    | 0.38   | 2758    | 220nm               |
| 26         | 20.025 | 26574    | 0.41   | 1111    | 262nm               |
| 27         | 28.184 | 18650    | 0.11   | 556     | 220nm               |
